# Supplementary material for: Diagnostika systémových zánětlivých onemocnění
Source: Springer Nature journal article supplement (doi:10.1038/s41591-019-0375-9), 2010-10-03
Supplement: 41591_2019_375_MOESM1_ESM.pdf [file 41591_2019_375_MOESM1_ESM.pdf]

In the format provided by the authors and unedited.

# Adult hippocampal neurogenesis is abundant in neurologically healthy subjects and drops sharply in patients with Alzheimer's disease

Elena P. Moreno-Jiménez<sup>1,2,3,6</sup>, Miguel Flor-García<sup>1,2,3,6</sup>, Julia Terreros-Roncal<sup>1,2,3,6</sup>, Alberto Rábano<sup>4</sup>, Fabio Cafini<sup>5</sup>, Noemí Pallas-Bazarra <sup>1,3</sup>, Jesús Ávila<sup>1,3</sup> and María Llorens-Martín <sup>1,2,3\*</sup>

---

<sup>1</sup>Department of Molecular Neuropathology, Centro de Biología Molecular 'Severo Ochoa', CBMSO, CSIC-UAM, Madrid, Spain. <sup>2</sup>Department of Molecular Biology, Faculty of Sciences, Universidad Autónoma de Madrid, Madrid, Spain. <sup>3</sup>Center for Networked Biomedical Research on Neurodegenerative Diseases (CIBERNED), Madrid, Spain. <sup>4</sup>Neuropathology Department, CIEN Foundation, Madrid, Spain. <sup>5</sup>Universidad Europea de Madrid, Faculty of Biomedical and Health Sciences, Madrid, Spain. <sup>6</sup>These authors contributed equally: E. P. Moreno-Jiménez, M. Flor-García, J. Terreros-Roncal.

\*e-mail: [m.llorens@csic.es](mailto:m.llorens@csic.es)

## PRIMARY ANTIBODIES USED IN EXPERIMENTS

| ANTIGEN                   | COMPANY          | HOST SPECIES | RRID             | CONCENTRATION | NaBH <sub>4</sub> and ANTIGEN RETRIEVAL |
|---------------------------|------------------|--------------|------------------|---------------|-----------------------------------------|
| Doublecortin              | SANTA CRUZ       | GOAT         | RRID:AB_2088494  | 1:1,000       | Required                                |
| Doublecortin              | SANTA CRUZ       | MOUSE        | RRID:AB_10610966 | 1:50          | Required                                |
| Doublecortin              | GLEESON LAB      | RABBIT       | -                | 1:200         | Required                                |
| Doublecortin              | ATLAS            | RABBIT       | RRID:AB_2674950  | 1:50          | Required                                |
| PSA-NCAM                  | MILLIPORE        | MOUSE        | RRID:AB_95211    | 1:1,000       | Required                                |
| Calretinin                | SWANT            | RABBIT       | RRID:AB_2619710  | 1:500         | Not Required                            |
| Phosphorylated Histone3   | MILLIPORE        | RABBIT       | RRID:AB_310177   | 1:250         | Required                                |
| Prox1                     | RELIA TECH       | RABBIT       | RRID:AB_10013821 | 1:500         | Required                                |
| NeuN                      | MILLIPORE        | RABBIT       | RRID:AB_10807945 | 1:1,000       | Not Required                            |
| 4R-Tau                    | MILLIPORE        | MOUSE        | RRID:AB_310014   | 1:500         | Required                                |
| Total Tau                 | SYNAPTIC SYSTEMS | RABBIT       | RRID:AB_1147195  | 1:500         | Required                                |
| Calbindin                 | SWANT            | RABBIT       | RRID:AB_2721225  | 1:500         | Not Required                            |
| β-III Tubulin             | PROMEGA          | MOUSE        | RRID:AB_430874   | 1:1000        | Required                                |
| GFAP                      | MILLIPORE        | MOUSE        | RRID:AB_2294571  | 1:1,000       | Not Required                            |
| Phosphorylated Tau (S396) | THERMO FISHER    | RABBIT       | RRID:AB_2533745  | 1:500         | Not Required                            |
| β-Amyloid                 | COVANCE          | MOUSE        | RRID:AB_2564682  | 1:1,000       | Not Required. 70% Formic acid required  |

## SECONDARY ANTIBODIES USED IN EXPERIMENTS

| ANTIBODY                  | COMPANY       | HOST SPECIES | CATALOG NUMBER | RRID            | CONCENTRATION |
|---------------------------|---------------|--------------|----------------|-----------------|---------------|
| Alexa-555 anti-goat       | THERMO FISHER | DONKEY       | A-21432        | RRID:AB_2535853 | 1:1,000       |
| Alexa-488 anti-goat       | THERMO FISHER | DONKEY       | A-11055        | RRID:AB_2534102 | 1:1,000       |
| Alexa-488 anti-rabbit     | THERMO FISHER | DONKEY       | A-21206        | RRID:AB_2535792 | 1:1,000       |
| Alexa-647 anti-rabbit     | THERMO FISHER | DONKEY       | A-31573        | RRID:AB_2536183 | 1:1,000       |
| Alexa-555 anti-rabbit     | THERMO FISHER | DONKEY       | A-31572        | RRID:AB_162543  | 1:1,000       |
| Alexa-488 anti-mouse      | THERMO FISHER | DONKEY       | A-21202        | RRID:AB_141607  | 1:1,000       |
| Alexa-647 anti-mouse      | THERMO FISHER | DONKEY       | A-31571        | RRID:AB_162542  | 1:1,000       |
| Alexa-555 anti-mouse      | THERMO FISHER | DONKEY       | A-31570        | RRID:AB_2536180 | 1:1,000       |
| Alexa-488 anti-rat        | THERMO FISHER | DONKEY       | A-21208        | RRID:AB_2535794 | 1:1,000       |
| Alexa-488 anti-guinea pig | THERMO FISHER | GOAT         | A-11073        | RRID:AB_2534117 | 1:1,000       |

## OTHER PRIMARY ANTIBODIES USED IN EXPERIMENTAL SETUP

| ANTIGEN            | COMPANY           | HOST SPECIES | RRID             | SIGNAL SPECIFICITY<br>(- HC-AR -NaBH <sub>4</sub> ) | SIGNAL SPECIFICITY<br>(+HC-AR +NaBH <sub>4</sub> ) |
|--------------------|-------------------|--------------|------------------|-----------------------------------------------------|----------------------------------------------------|
| NG2                | R & D DIAGNOSTICS | RAT          | RRID:AB_10890940 | ABSENT                                              | ABSENT                                             |
| NG2                | THERMO FISHER     | RAT          | RRID:AB_2606388  | ABSENT                                              | ABSENT                                             |
| NG2                | MILLIPORE         | MOUSE        | RRID:AB_570627   | ABSENT                                              | POOR                                               |
| Sox2               | R & D DIAGNOSTICS | GOAT         | RRID:AB_355110   | ABSENT                                              | POOR                                               |
| Sox2               | R & D DIAGNOSTICS | MOUSE        | RRID:AB_358009   | ABSENT                                              | POOR                                               |
| Sox2               | MILLIPORE         | RABBIT       | RRID:AB_2286686  | ABSENT                                              | ABSENT                                             |
| Sox2               | PROTEINTECH       | RABBIT       | RRID:AB_2195801  | ABSENT                                              | ABSENT                                             |
| Nestin             | DSHB              | MOUSE        | RRID:AB_2235915  | ABSENT                                              | ABSENT                                             |
| Nestin             | SIGMA ALDRICH     | RABBIT       | RRID:AB_1841032  | ABSENT                                              | ABSENT                                             |
| BLBP               | ABCAM             | RABBIT       | RRID:AB_880078   | ABSENT                                              | ABSENT                                             |
| BLBP               | ABCAM             | MOUSE        | RRID:AB_11157091 | ABSENT                                              | ABSENT                                             |
| Prox1              | MILLIPORE         | RABBIT       | RRID:AB_177485   | ABSENT                                              | ABSENT                                             |
| PSA-NCAM           | DSHB              | MOUSE        | RRID:AB_528392   | ABSENT                                              | ABSENT                                             |
| Pax6               | DSHB              | CHICKEN      | RRID:AB_528427   | ABSENT                                              | ABSENT                                             |
| Tau                | SYNAPTIC SYSTEMS  | GUINEA PIG   | RRID:AB_1547385  | ABSENT                                              | GOOD                                               |
| Tau1               | MILLIPORE         | MOUSE        | RRID:AB_94855    | ABSENT                                              | GOOD                                               |
| B-III Tubulin      | SYNAPTIC SYSTEMS  | GUINEA PIG   | RRID:AB_10805138 | POOR                                                | GOOD                                               |
| B-III Tubulin/Tuj1 | COVANCE           | MOUSE        | RRID:AB_2313773  | ABSENT                                              | ABSENT                                             |
| Calretinin         | SYNAPTIC SYSTEMS  | GUINEA PIG   | RRID:AB_10635160 | GOOD                                                | GOOD                                               |
| NeuN               | MILLIPORE         | MOUSE        | RRID:AB_2298772  | GOOD                                                | GOOD                                               |
| MAP1B (c-20)       | SANTA CRUZ        | GOAT         | RRID:AB_2137423  | ABSENT                                              | GOOD                                               |
| Tuc-4              | MILLIPORE         | RABBIT       | RRID:AB_91876    | ABSENT                                              | ABSENT                                             |
| Tbr1               | ABCAM             | RABBIT       | RRID:AB_2200219  | ABSENT                                              | ABSENT                                             |
| Tbr2               | ABCAM             | RABBIT       | RRID:AB_2721040  | ABSENT                                              | ABSENT                                             |
| Ki67               | DAKO              | MOUSE        | RRID:AB_2142367  | ABSENT                                              | ABSENT                                             |
| Ki67               | LEICA             | MOUSE        | RRID:AB_563841   | ABSENT                                              | ABSENT                                             |
| Ki67               | SYNAPTIC SYSTEMS  | RABBIT       | RRID:AB_2721095  | ABSENT                                              | ABSENT                                             |
| PCNA               | ABCAM             | rabbit       | RRID:AB_444313   | ABSENT                                              | ABSENT                                             |

**Supplementary Table 1: List of primary and secondary antibodies used in experiments, and other primary antibodies used in experiment set-up.** In the case of primary antibodies used in experiments, antigen, company, host species, RRID, concentration and performance (and necessity for it) of sample pre-treatment are shown. In the case of secondary antibodies used to detect the binding of primary antibodies, antibody, company, host species, catalog number, RRID, and concentration are shown. Validation of these antibodies is described in the **Life Sciences Reporting Summary**. In the case of other antibodies used in experimental set-up, antigen, company, host species, RRID, and specificity of the signal in the presence or absence of sample pre-treatment are shown. NaBH<sub>4</sub>: sodium borohydride. HC-AR: heat-mediated citrate buffer antigen retrieval.
