# Supplementary figures and images for: Diagnostika systémových zánětlivých onemocnění
Source: Springer Nature journal article supplement (doi:10.1038/s41591-019-0375-9), 2010-10-03

## Full-length, unprocessed blot for Extended Data Figure 4 i

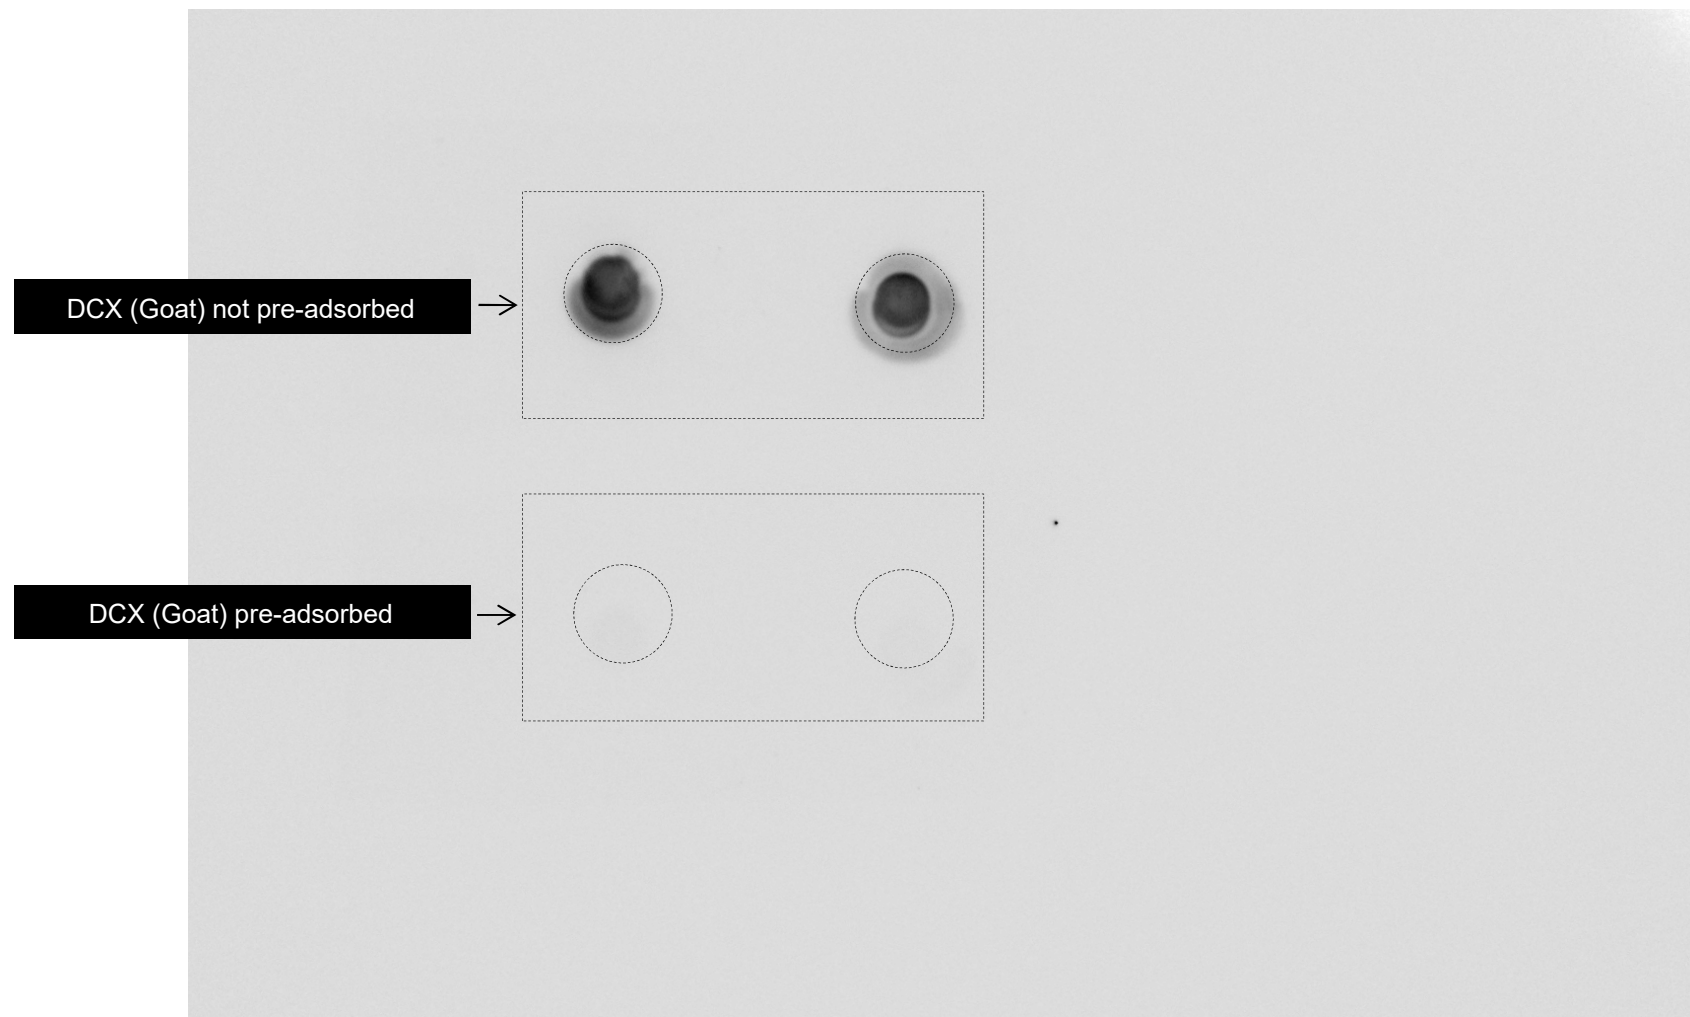

Supplement: 41591_2019_375_MOESM3_ESM.pdf [file 41591_2019_375_MOESM3_ESM.pdf]
